# Supplementary material
Source: PubMed Central journal article supplement (PMC7789353)

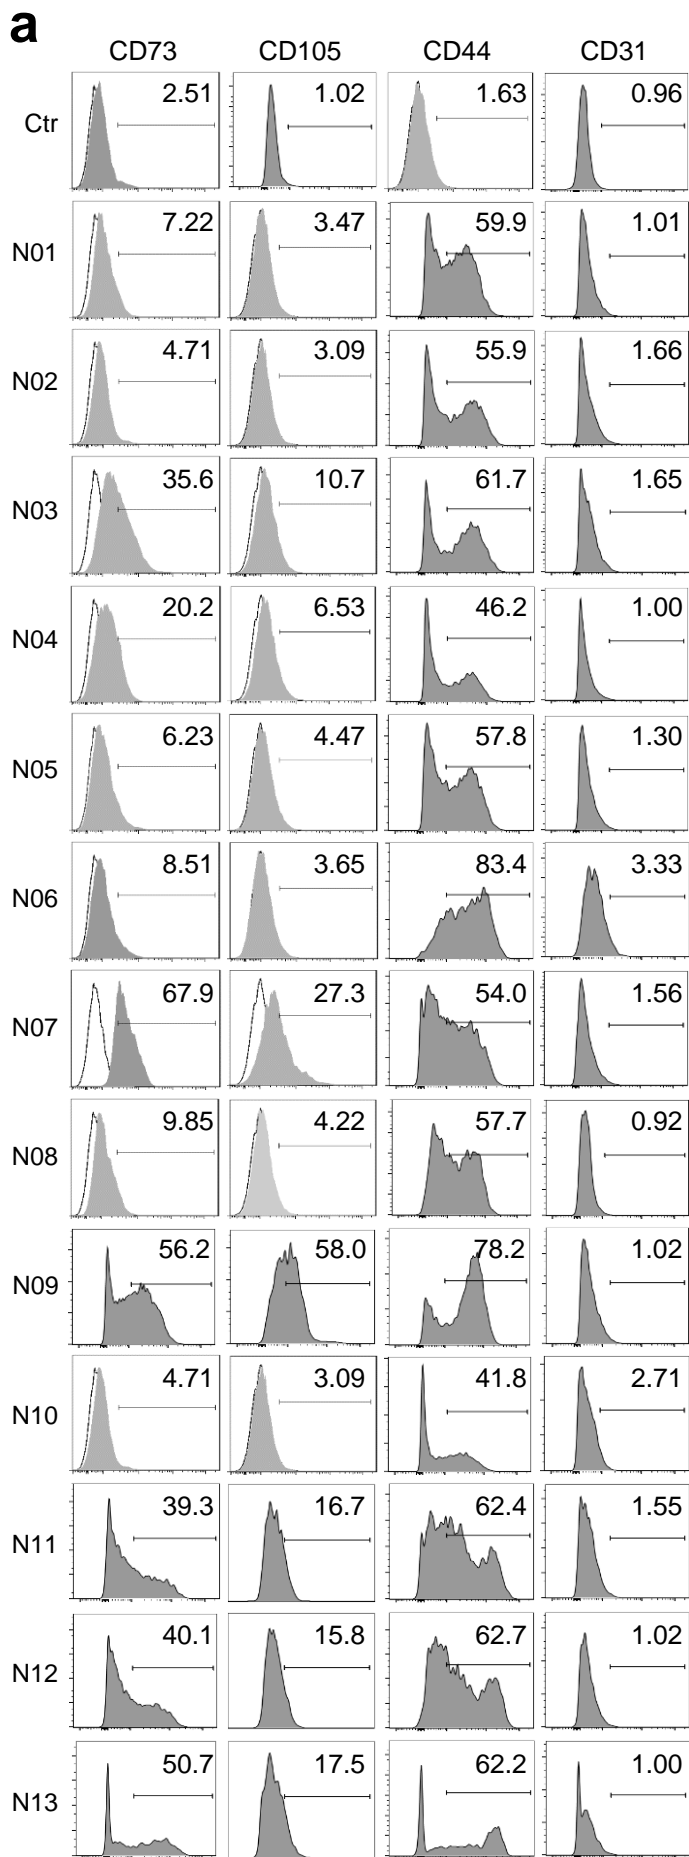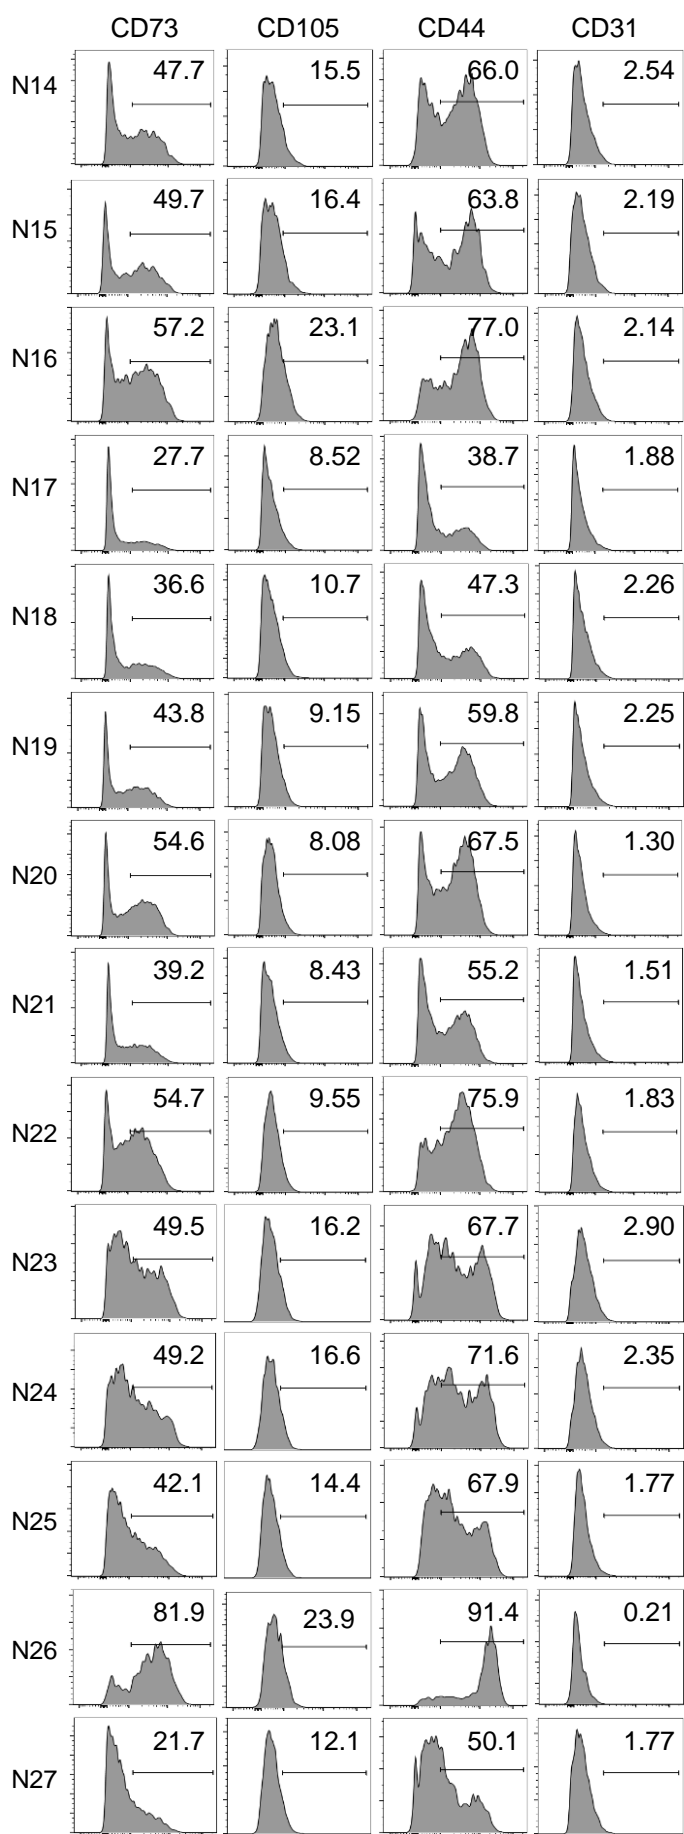

Supplement: 13578_2020_516_MOESM1_ESM.pdf [file 13578_2020_516_MOESM1_ESM.pdf]
