# Supplementary material
Source: PubMed Central journal article supplement (PMC7789353)

**a**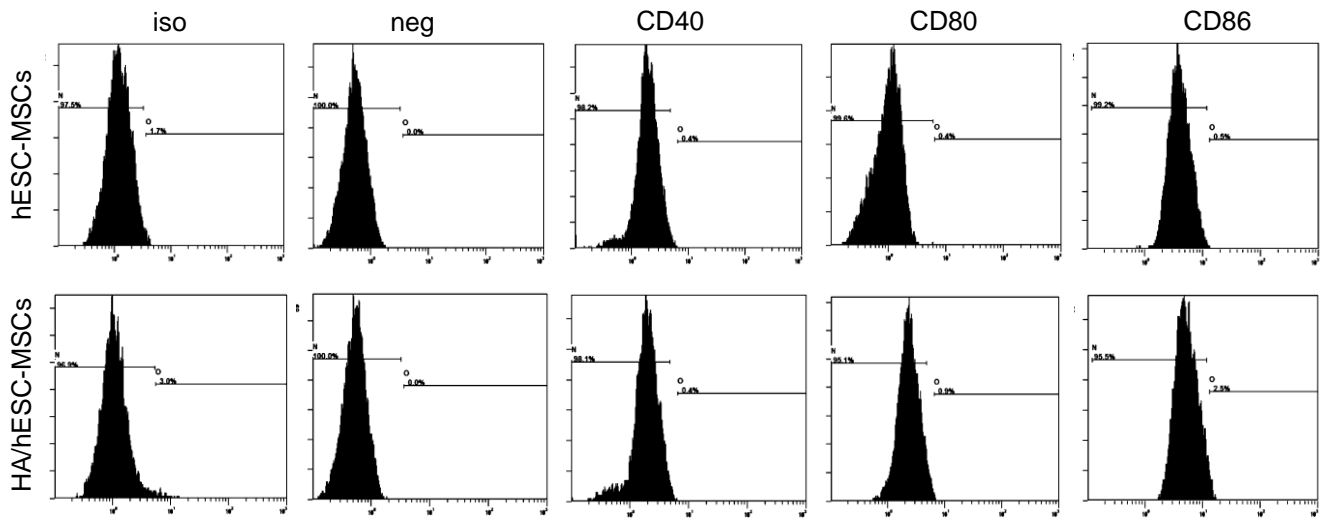

Supplement: 13578_2020_516_MOESM4_ESM.pdf [file 13578_2020_516_MOESM4_ESM.pdf]
