# Supplementary material
Source: PubMed Central journal article supplement (PMC7789353)
Supplement: 13578_2020_516_MOESM5_ESM.pdf [file 13578_2020_516_MOESM5_ESM.pdf]

**a****Correlation matrix (Pearson (n))**

| Variables                     | Sham     | PBS      | HA       | hESC-<br>MSCs | HA/hESC-<br>MSCs | OARSI<br>macroscopic<br>score | Mankin score<br>(H&E) | Mankin score<br>(Safranin-O) | Mankin score<br>(Alcian Blue) |
|-------------------------------|----------|----------|----------|---------------|------------------|-------------------------------|-----------------------|------------------------------|-------------------------------|
| Sham                          | <b>1</b> | -0.250   | -0.250   | -0.250        | -0.250           | 0.816                         | 0.632                 | 0.801                        | 0.824                         |
| PBS                           | -0.250   | <b>1</b> | -0.250   | -0.250        | -0.250           | -0.627                        | -0.773                | -0.584                       | -0.269                        |
| HA                            | -0.250   | -0.250   | <b>1</b> | -0.250        | -0.250           | -0.220                        | -0.304                | -0.447                       | -0.689                        |
| hESC-MSCs                     | -0.250   | -0.250   | -0.250   | <b>1</b>      | -0.250           | -0.251                        | 0.047                 | -0.031                       | -0.017                        |
| HA/hESC-MSCs                  | -0.250   | -0.250   | -0.250   | -0.250        | <b>1</b>         | 0.282                         | 0.398                 | 0.260                        | 0.151                         |
| OARSI<br>macroscopic score    | 0.816    | -0.627   | -0.220   | -0.251        | 0.282            | <b>1</b>                      | <b>0.934</b>          | <b>0.959</b>                 | 0.831                         |
| Mankin score<br>(H&E)         | 0.632    | -0.773   | -0.304   | 0.047         | 0.398            | <b>0.934</b>                  | <b>1</b>              | <b>0.956</b>                 | 0.799                         |
| Mankin score<br>(Safranin-O)  | 0.801    | -0.584   | -0.447   | -0.031        | 0.260            | <b>0.959</b>                  | <b>0.956</b>          | <b>1</b>                     | <b>0.932</b>                  |
| Mankin score<br>(Alcian Blue) | 0.824    | -0.269   | -0.689   | -0.017        | 0.151            | 0.831                         | 0.799                 | <b>0.932</b>                 | <b>1</b>                      |

\* **Note:** Values in *red* are different from 0 with a significance level ( $\alpha=0.05$ ).
